# Supplementary material for: Three 2D AgI-framework isomers with helical structures controlled by the chirality of camphor-10-sulfonic acid
Source: Royal Society of Chemistry journal article supplement (doi:10.1039/c0dt01384f), 2011-01-01
Supplement: c0dt01384f.pdf [file c0dt01384f.pdf]

# **Three 2D Ag<sup>I</sup>-Framework isomers with helical structures controlled by the chirality of camphor-10-sulfonic acid**

**Peng Guo\***

**State Key Laboratory of Rare Earth Resource Utilizations, Changchun Institute of Applied Chemistry, Chinese Academy of Sciences, Changchun, 130022, P. R. China.**

**Tel: 86-0431-85262941**

**E-mail: pguo@ciac.jl.cn**

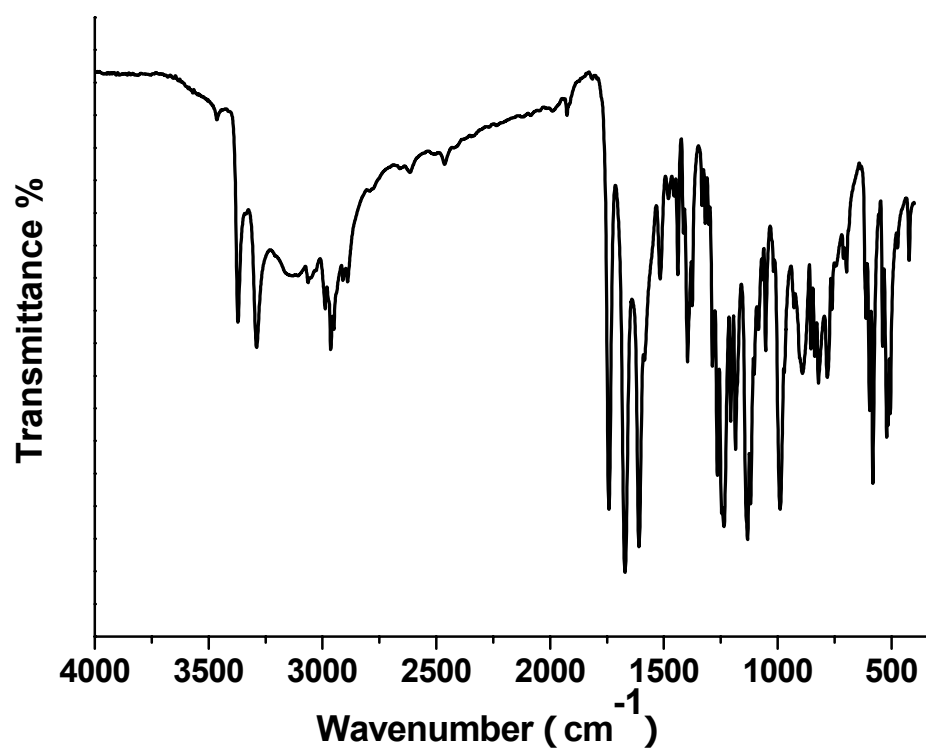

Fig.S1 The infrared spectrum of the complex 1

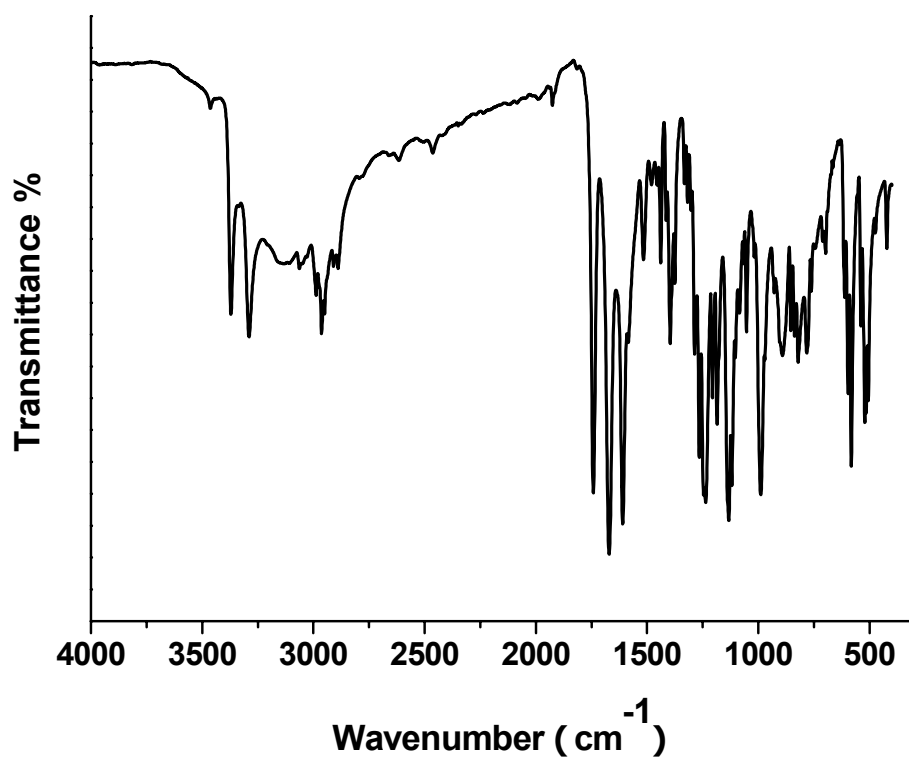

Fig.S2 The infrared spectrum of the complex 2

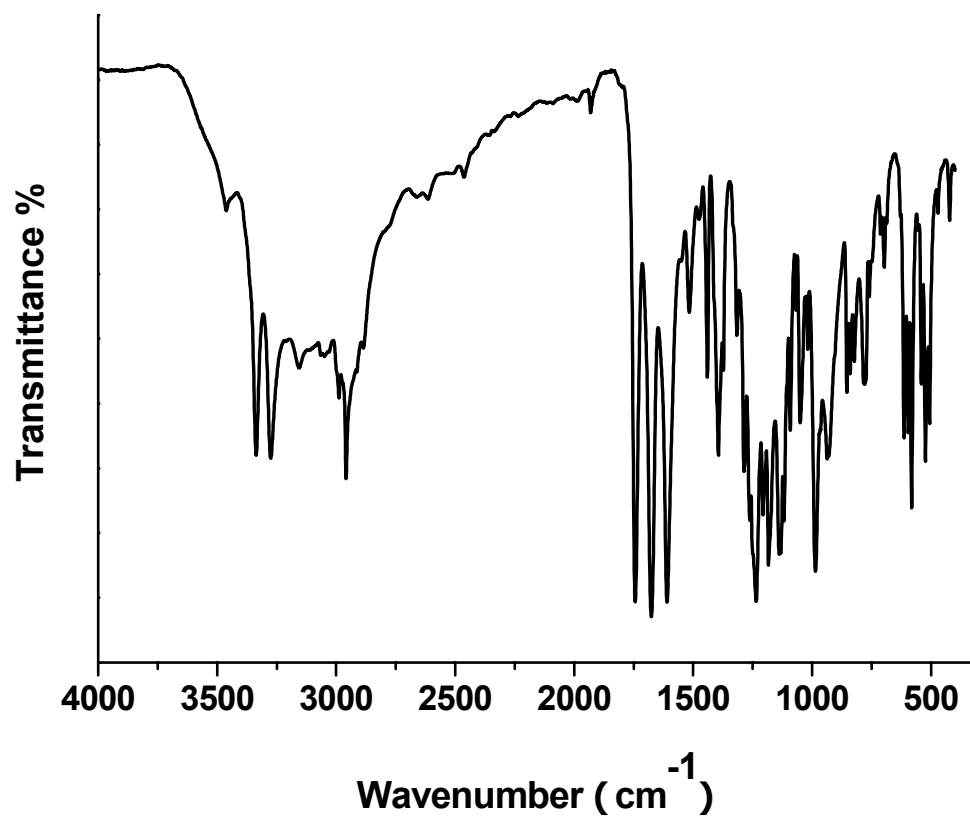

Fig.S3 The infrared spectrum of the complex 3

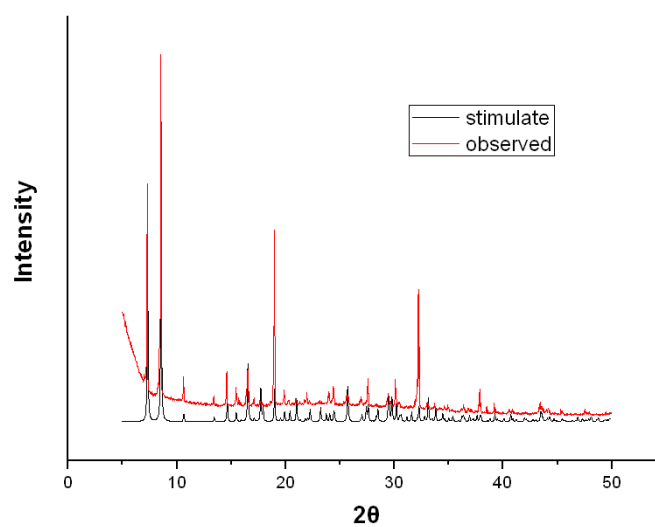

Fig.S4 PXRD of the complex 1

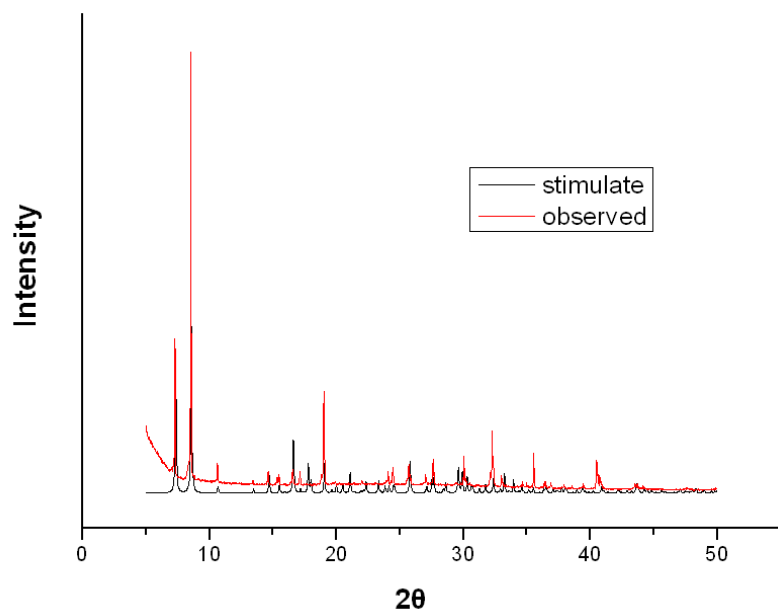

Fig.S5 PXR D of the complex 2

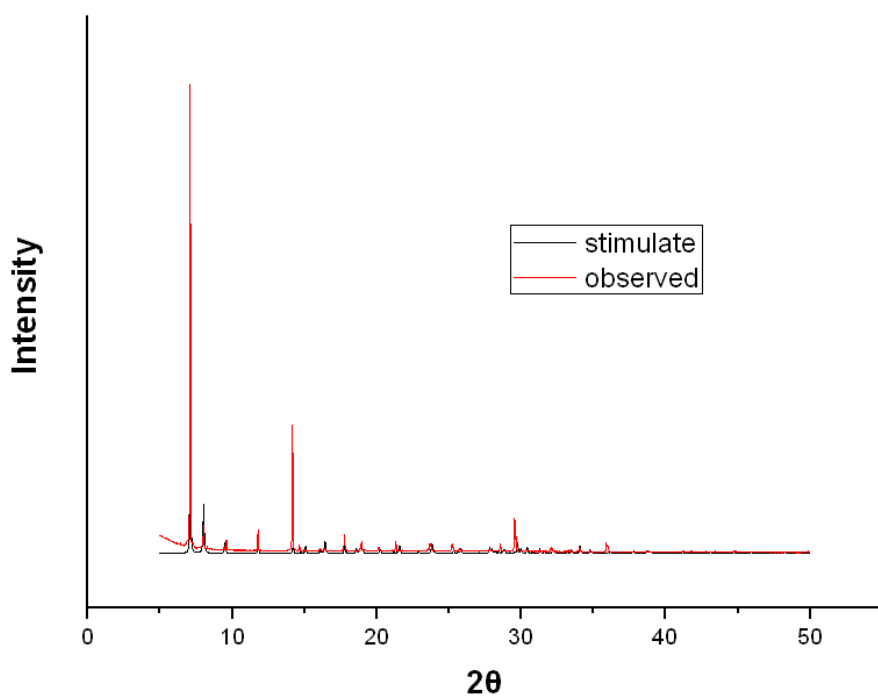

Fig.S6 PXR D of the complex 3

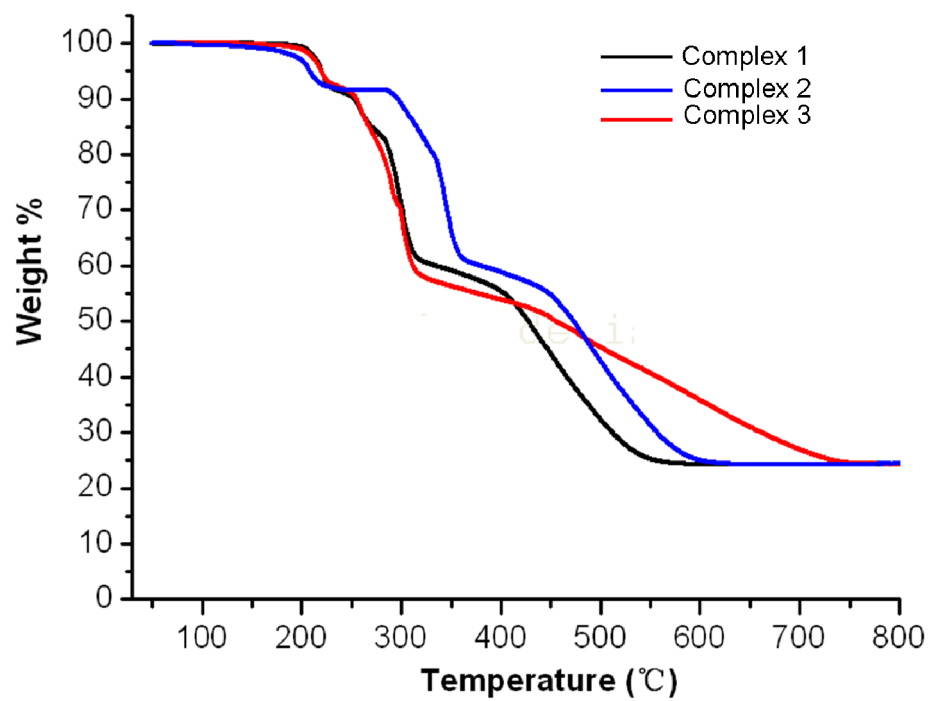

Fig.S7 TG curves of complex 1, complex 2, and complex 3
